# Supplementary material for: Analysis and comparison of the trends in burden of injury in China and ASEAN countries from 1990 to 2021 and its association with the socio-demographic index
Source: Research Square preprint supplement (doi:10.21203/rs.3.rs-5825013/v1), 2025-01-17
Supplement: Supplementary file 1 [file bcc1e9dae9f4d82471b83764.docx]

**Supplementary figure 1** The APC of ASIR of injury in China,ASEAN countries and global from 1990 to 2021 (* means p-values < 0.05 and significant results).(a) Global; (b) China;(c) Brunei; (d) Cambodia; (e) Indonesia; (f) Laos; (g) Malaysia; (h) Myanmar; (i) Philippines; (j) Singapore; (k) Thailand; (l) Vietnam.

| 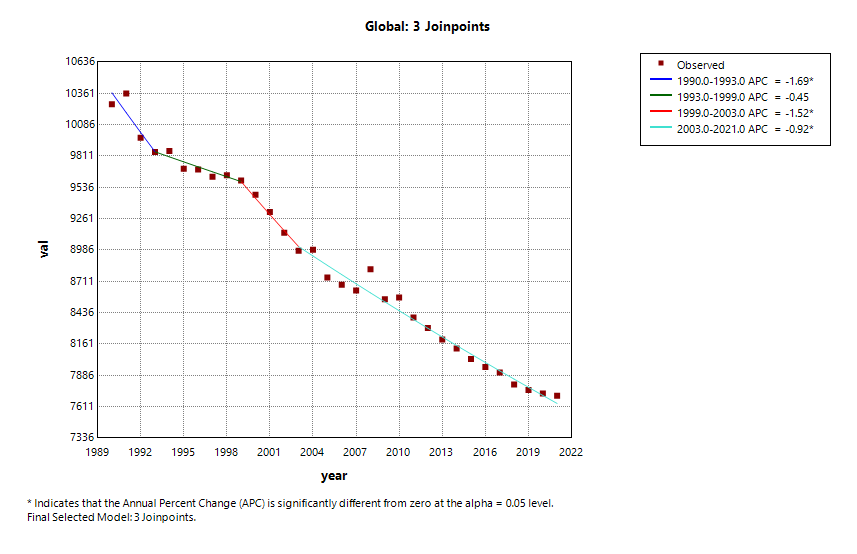 | 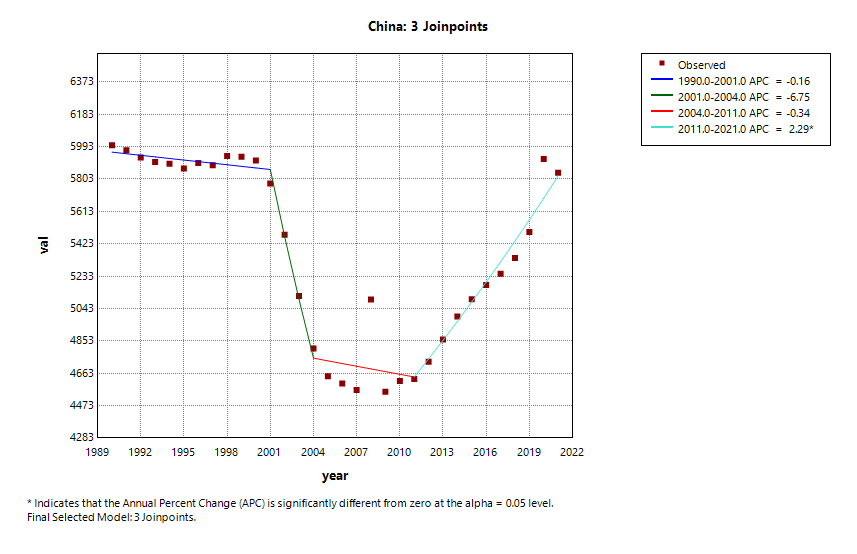 |
| --- | --- |
| (a) | (b) |
| 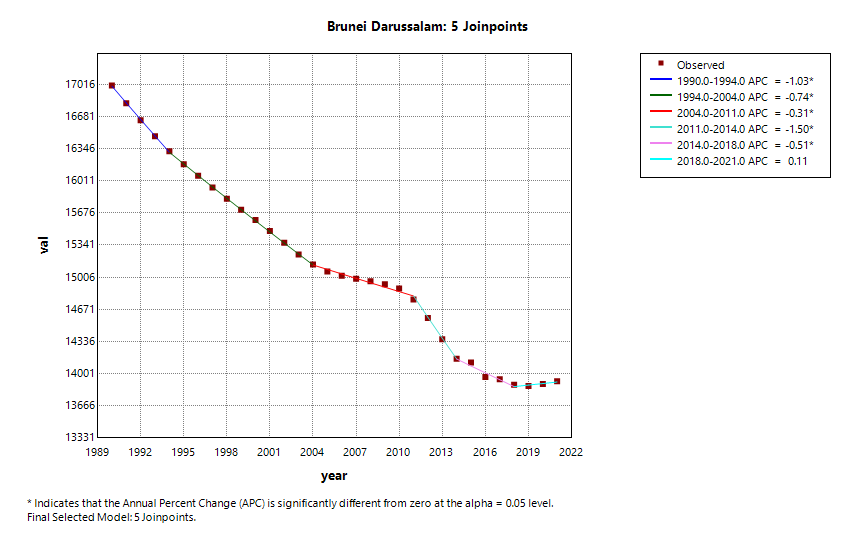 | 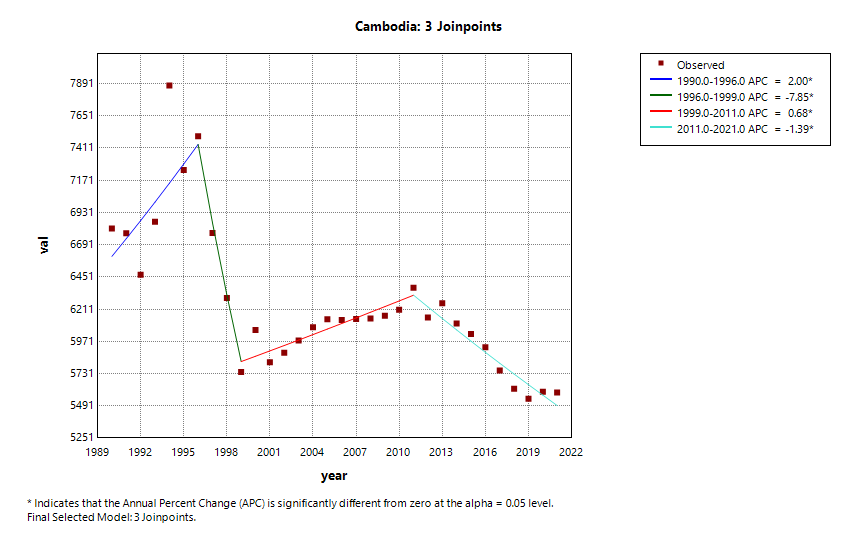 |
| (c) | (d) |
| 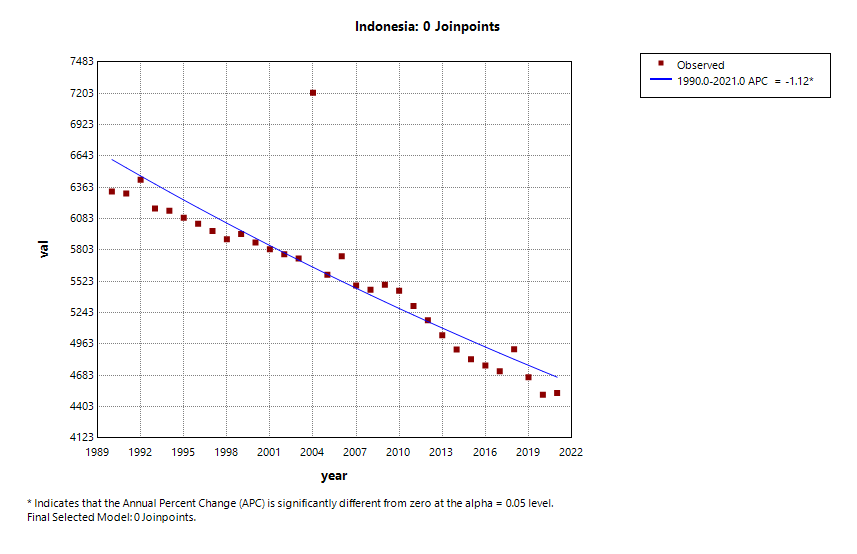 | 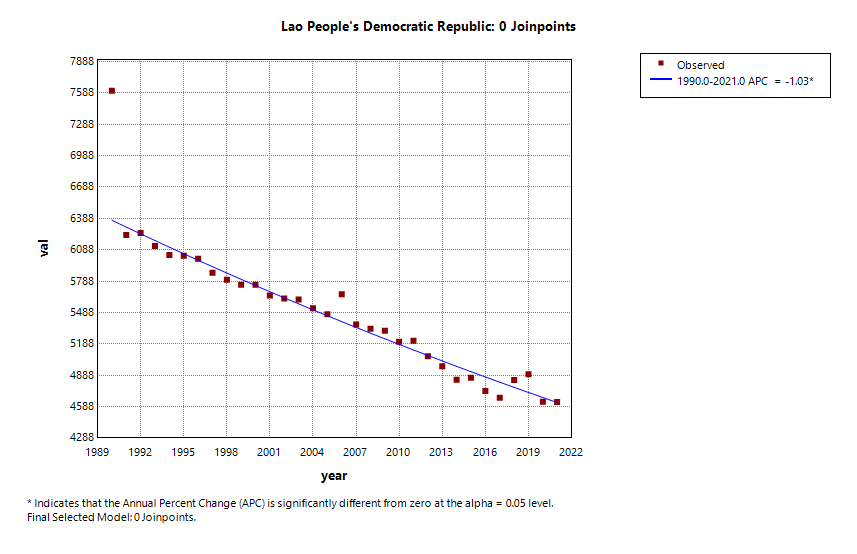 |
| (e) | (f) |
| 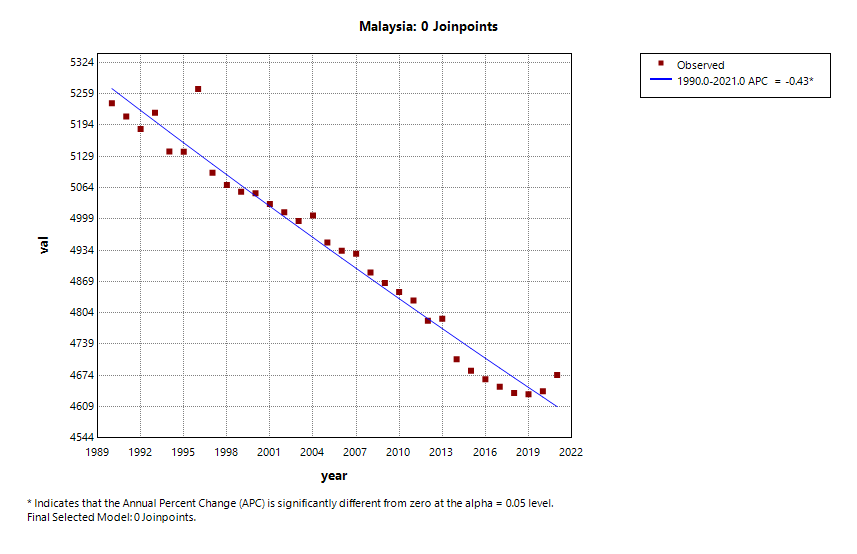 | 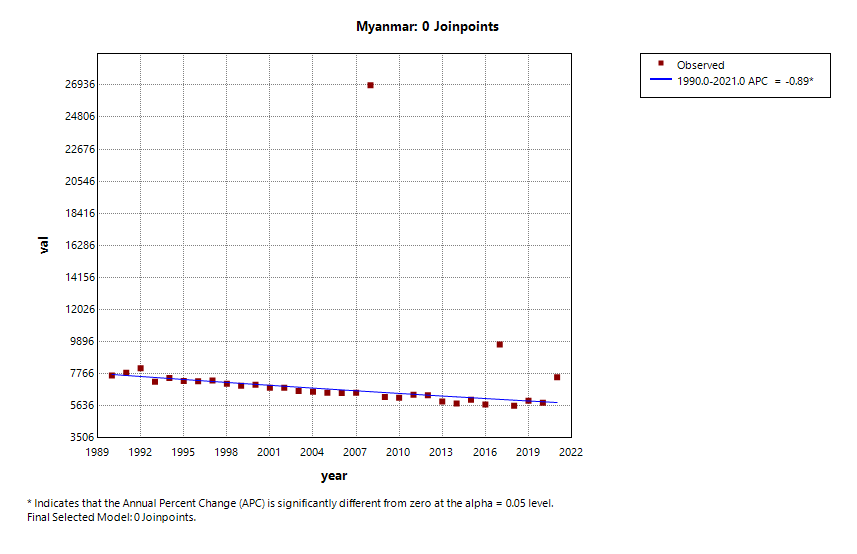 |
| (g) | (h) |
| 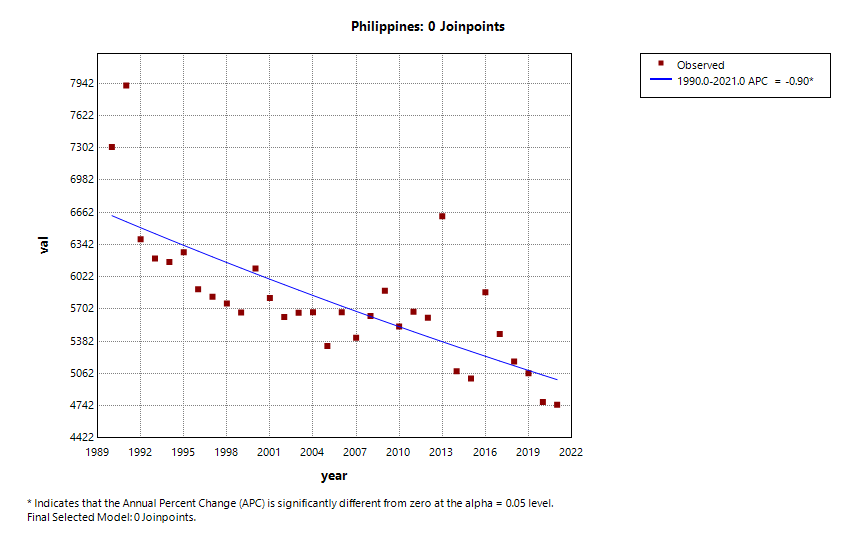 | 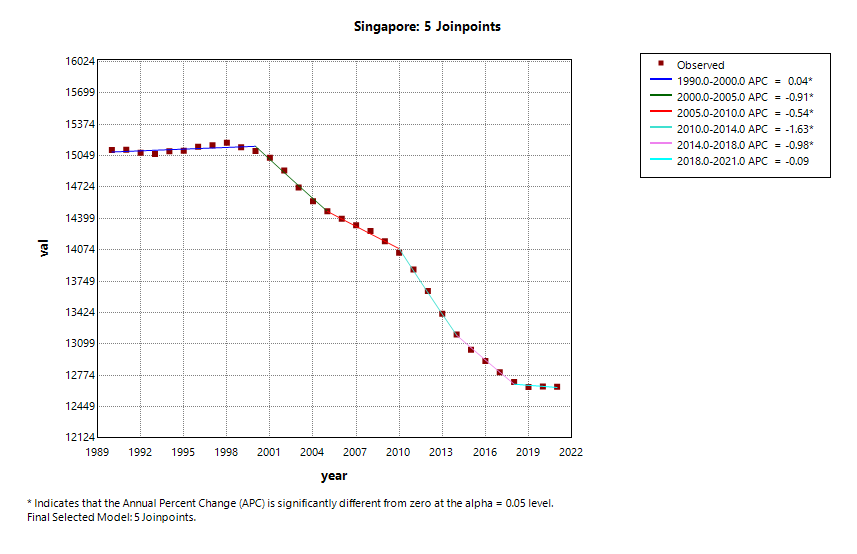 |
| (i) | (j) |
| 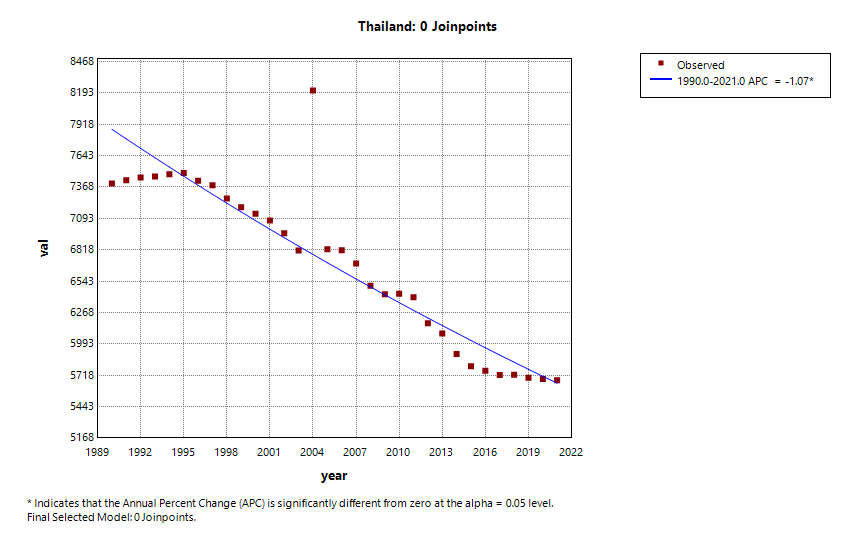 | 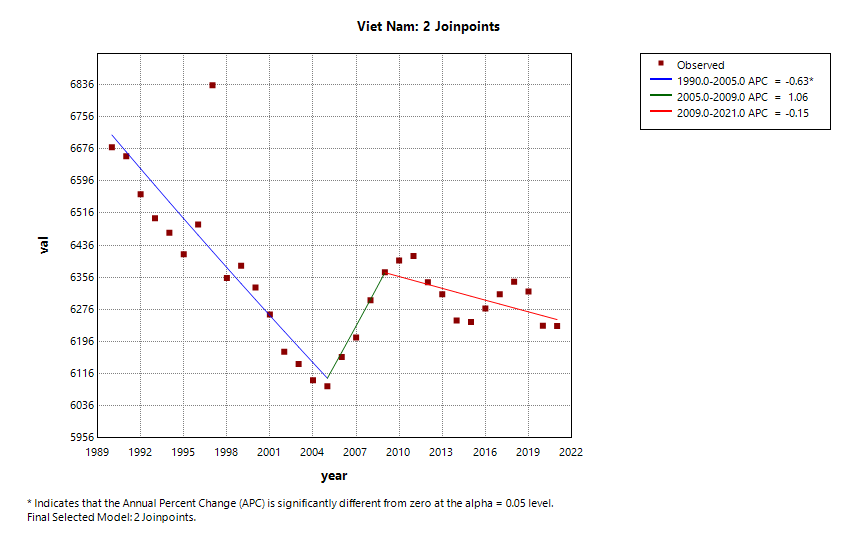 |
| (k) | (l) |

**Supplementary figure 2** The APC of ASPR of injury in China,ASEAN countries and global from 1990 to 2021 (* means p-values < 0.05 and significant results).(a) Global; (b) China;(c) Brunei; (d) Cambodia; (e) Indonesia; (f) Laos; (g) Malaysia; (h) Myanmar; (i) Philippines; (j) Singapore; (k) Thailand; (l) Vietnam.

| 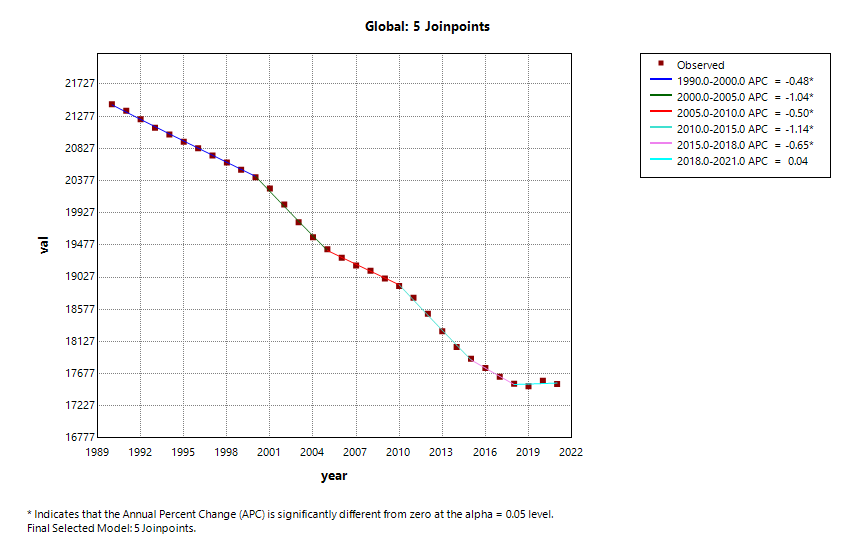 | 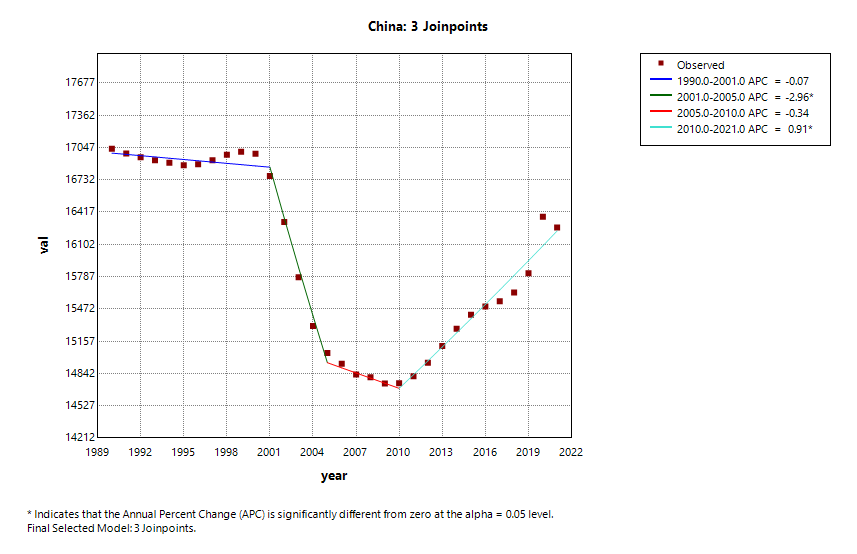 |
| --- | --- |
| (a) | (b) |
| 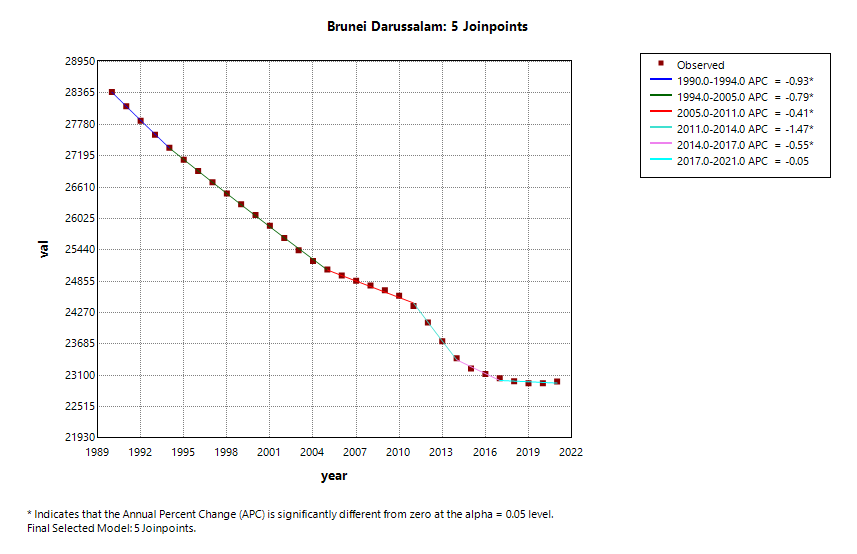 | 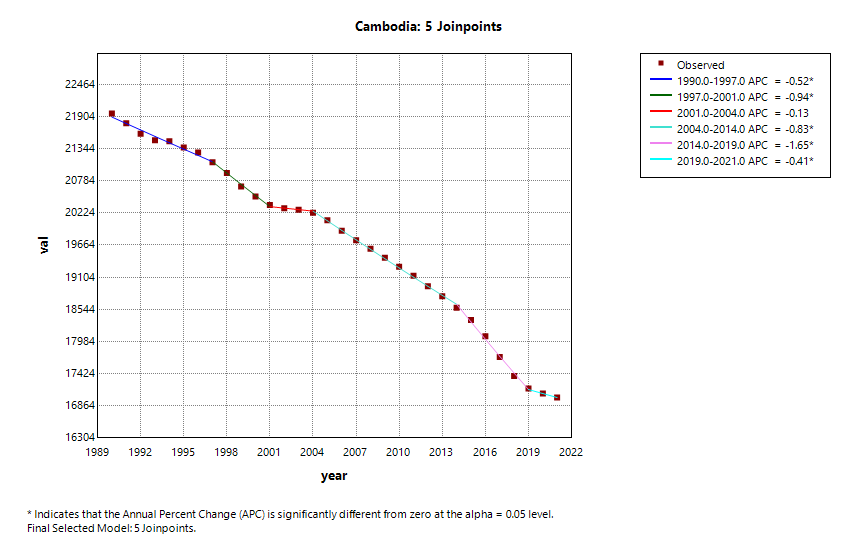 |
| (c) | (d) |
| 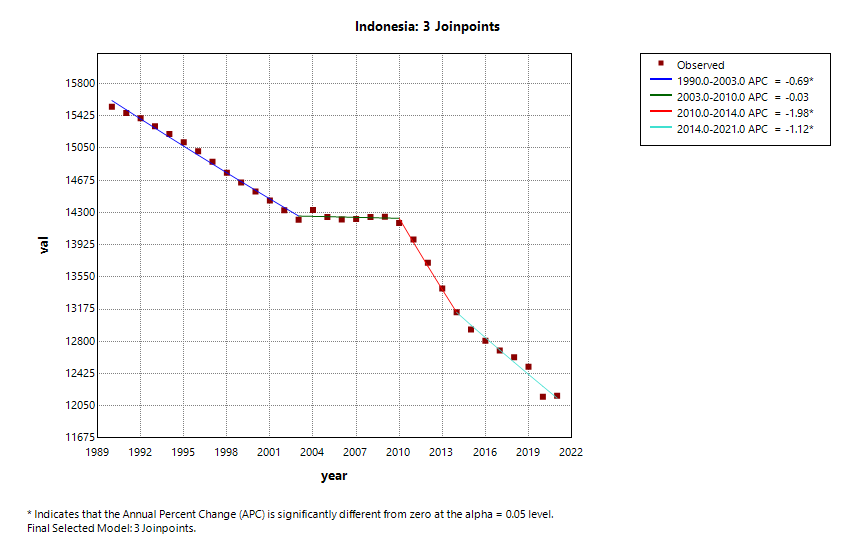 | 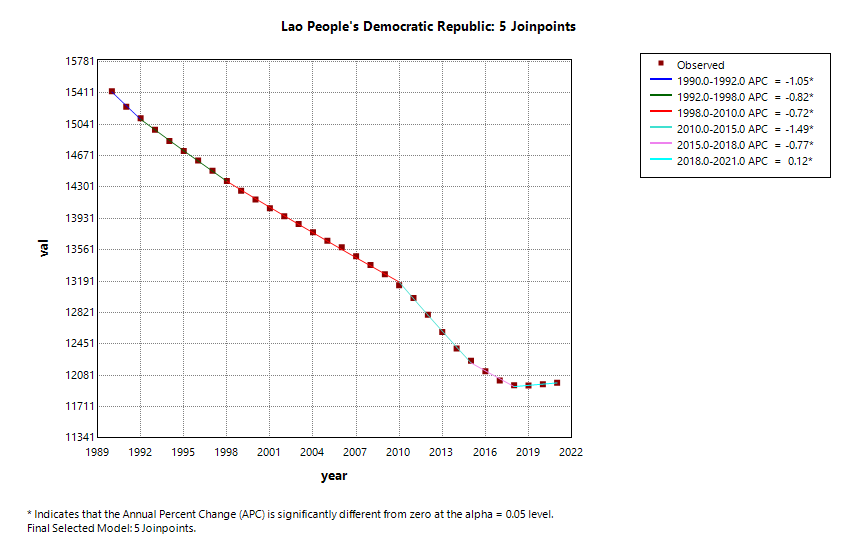 |
| (e) | (f) |
| 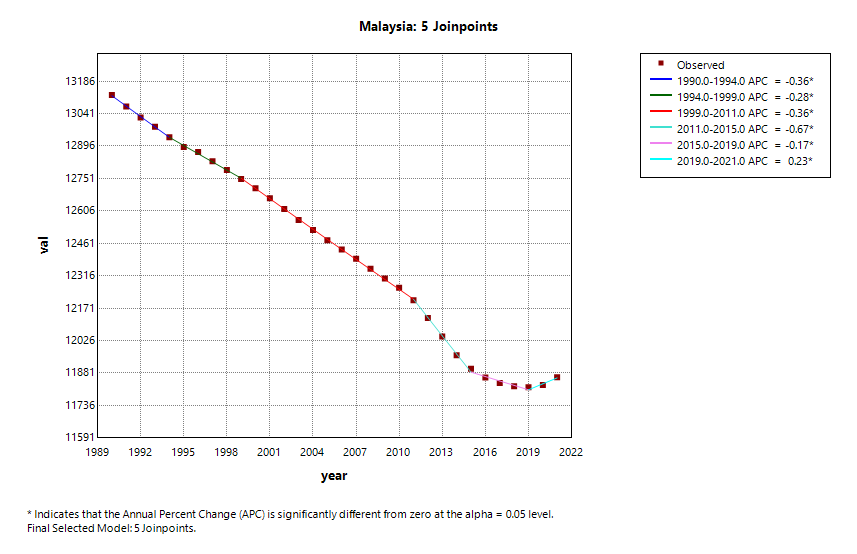 | 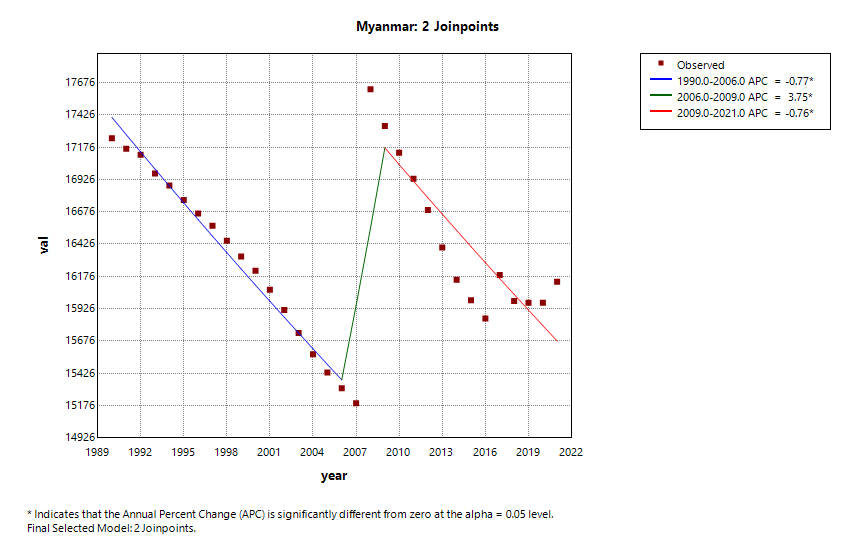 |
| (g) | (h) |
| 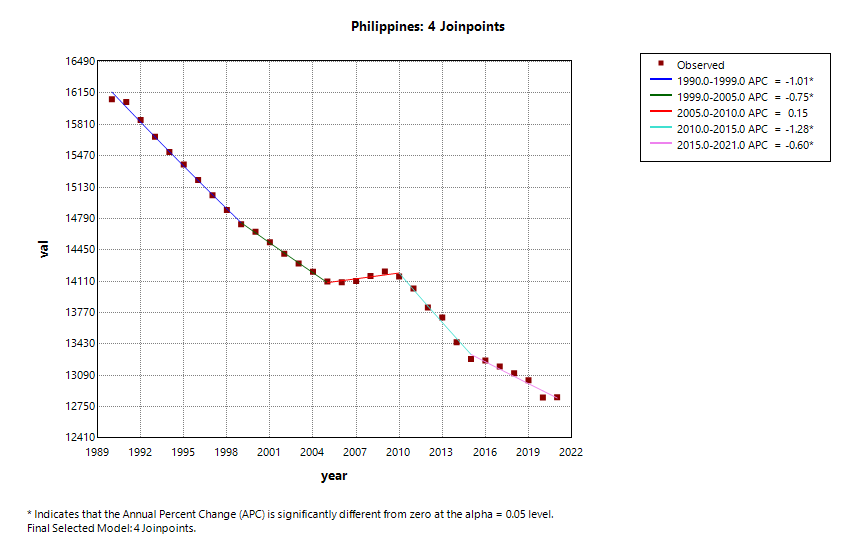 | 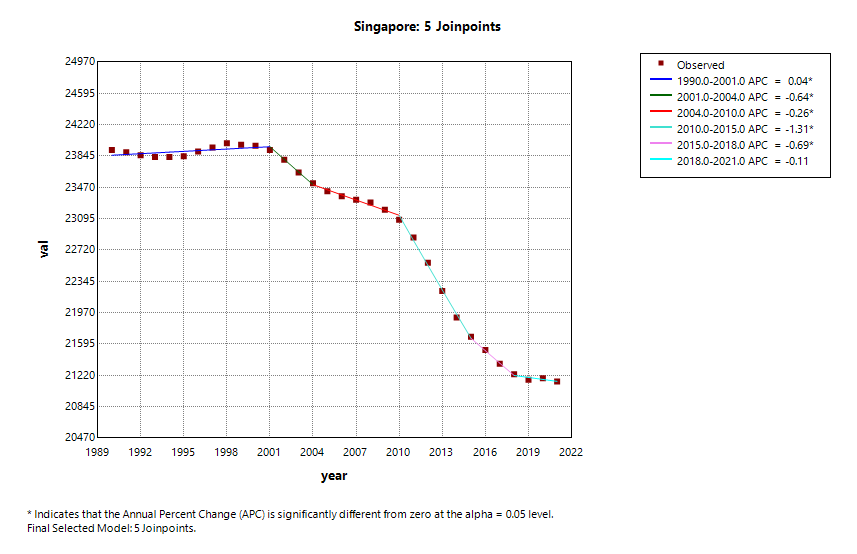 |
| (i) | (j) |
| 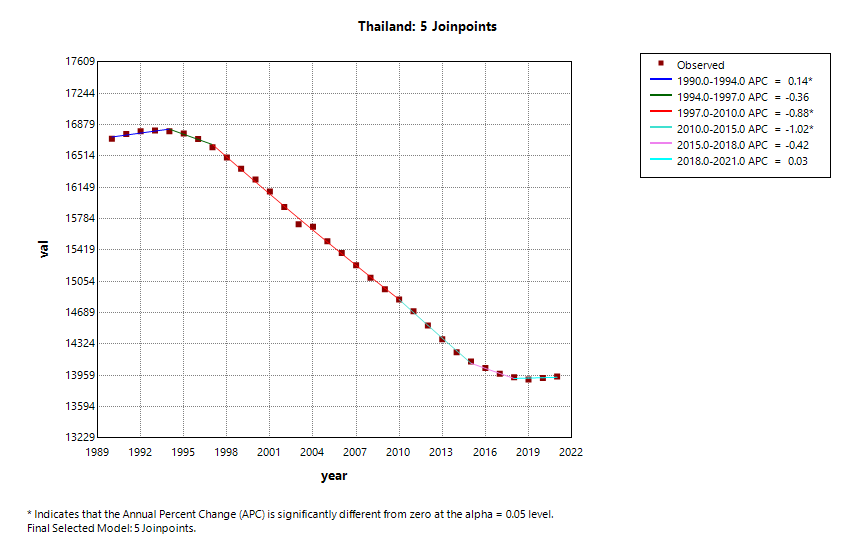 | 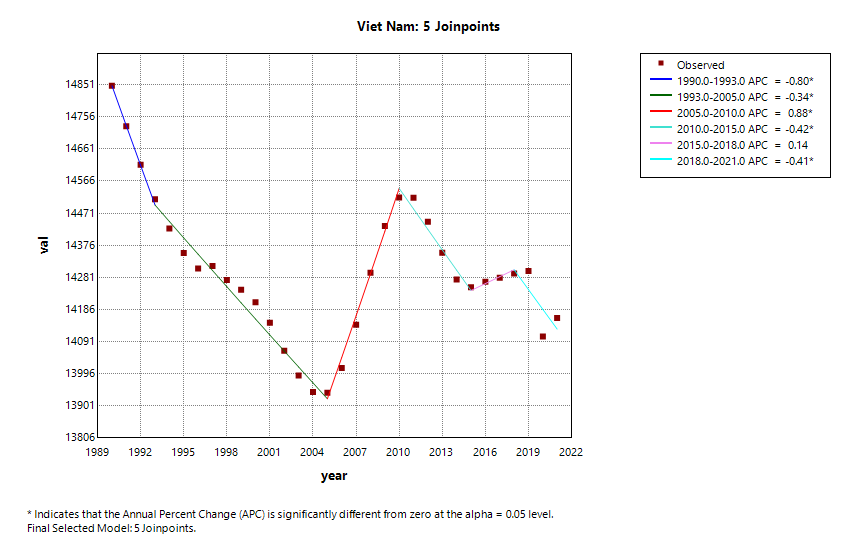 |
| (k) | (l) |

**Supplementary figure 3** The APC of ASMR of injury in China,ASEAN countries and global from 1990 to 2021 (* means p-values < 0.05 and significant results).(a) Global; (b) China;(c) Brunei; (d) Cambodia; (e) Indonesia; (f) Laos; (g) Malaysia; (h) Myanmar; (i) Philippines; (j) Singapore; (k) Thailand; (l) Vietnam.

| 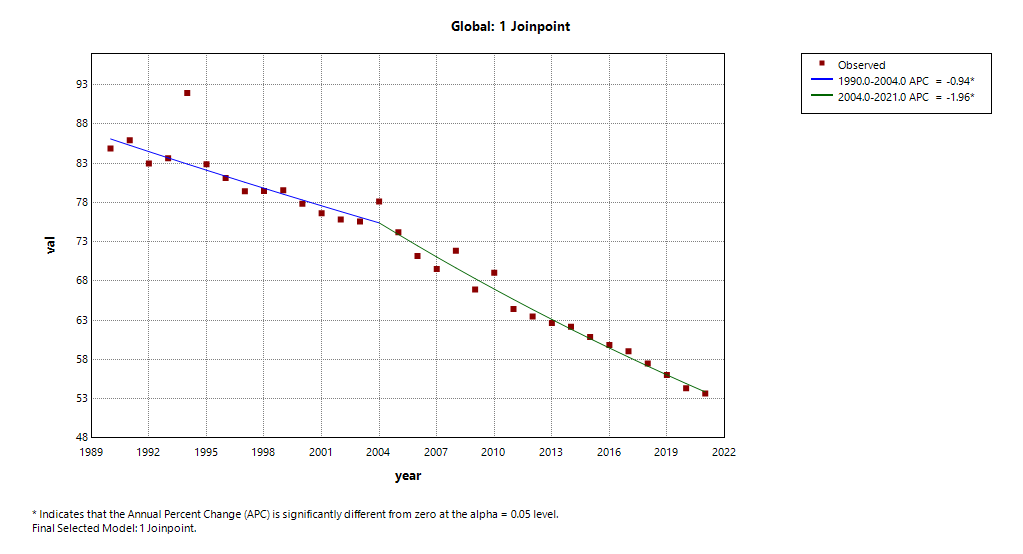 | 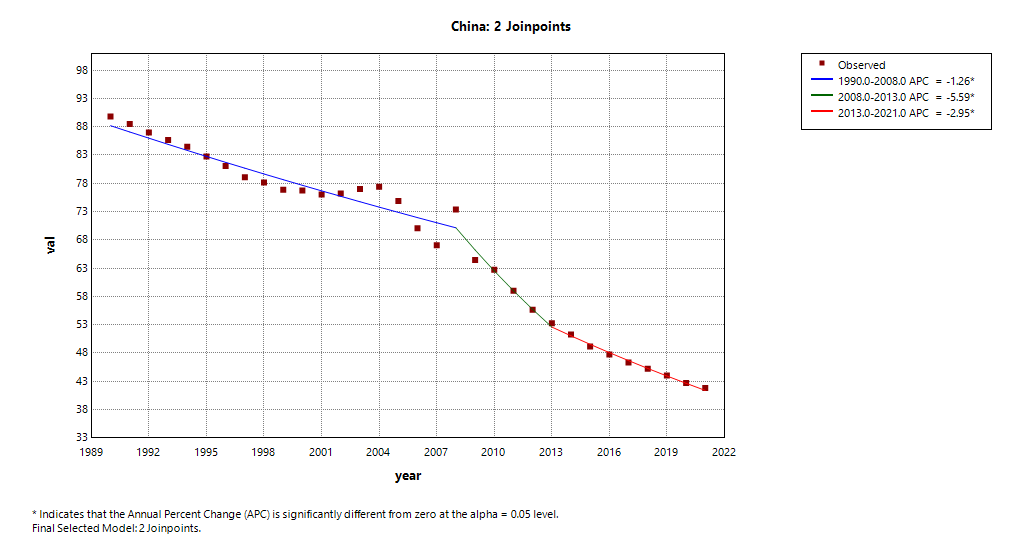 |
| --- | --- |
| (a) | (b) |
| 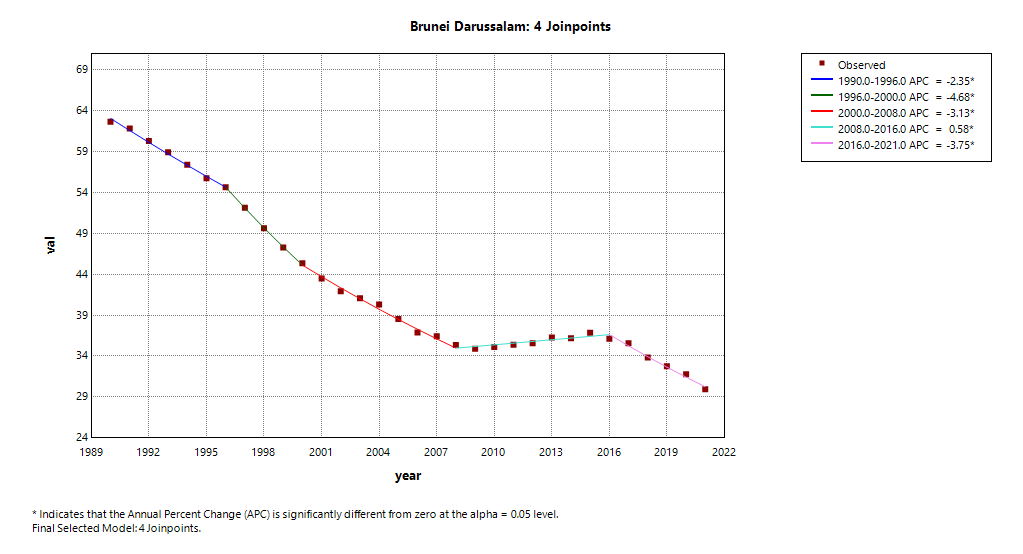 | 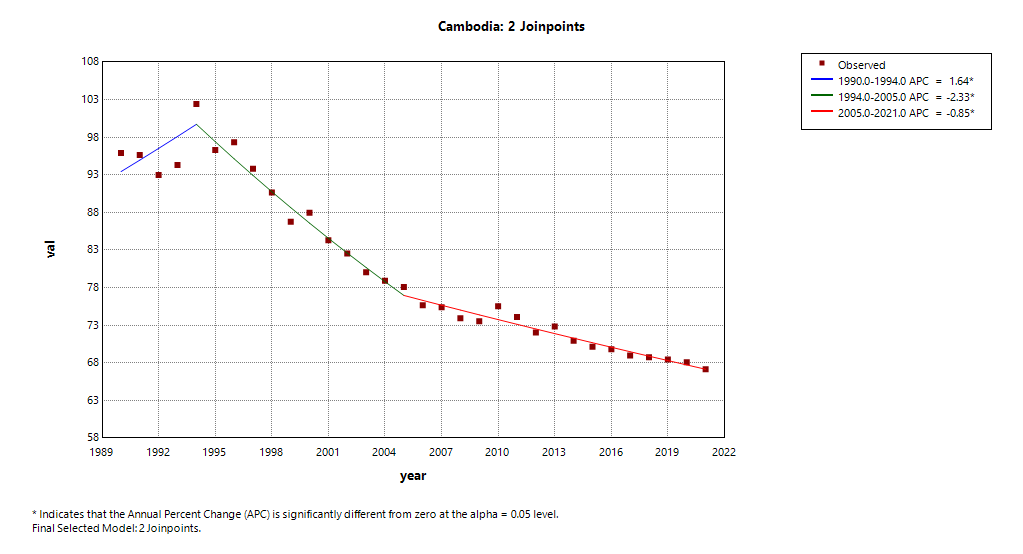 |
| (c) | (d) |
| 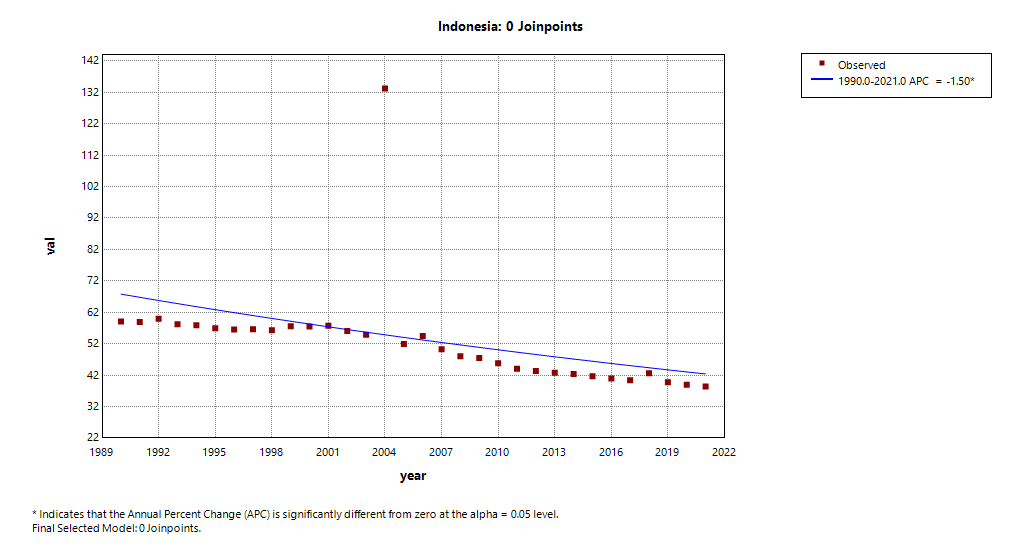 | 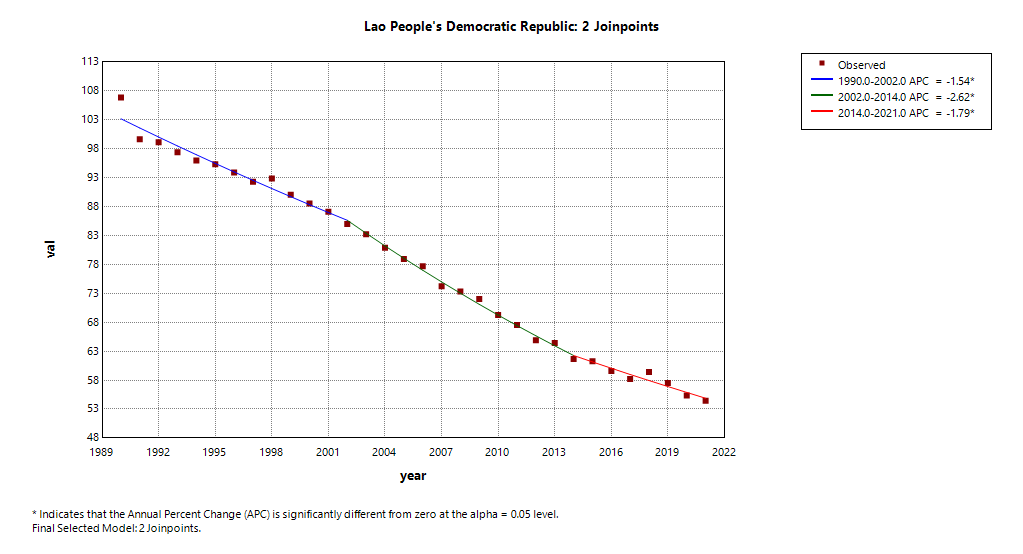 |
| (e) | (f) |
| 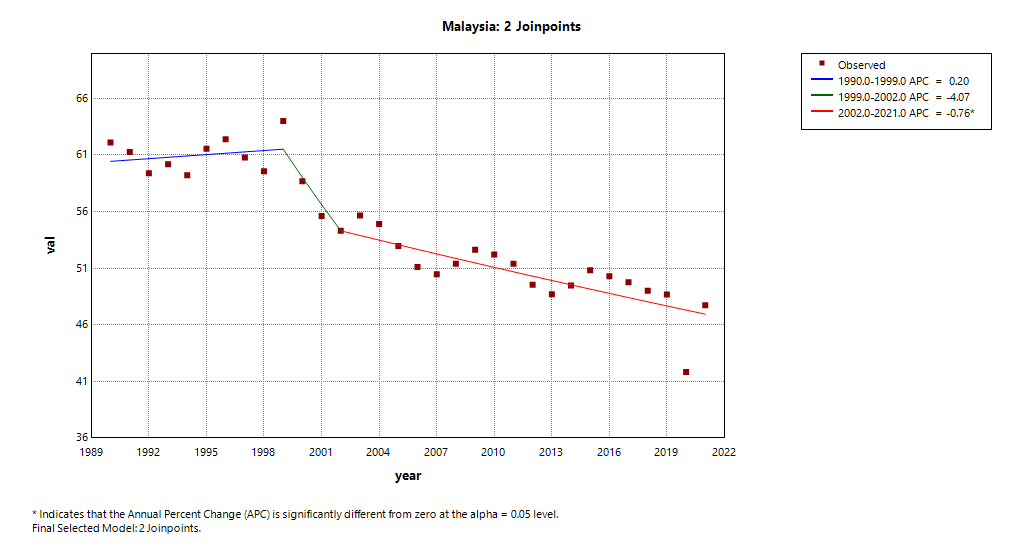 | 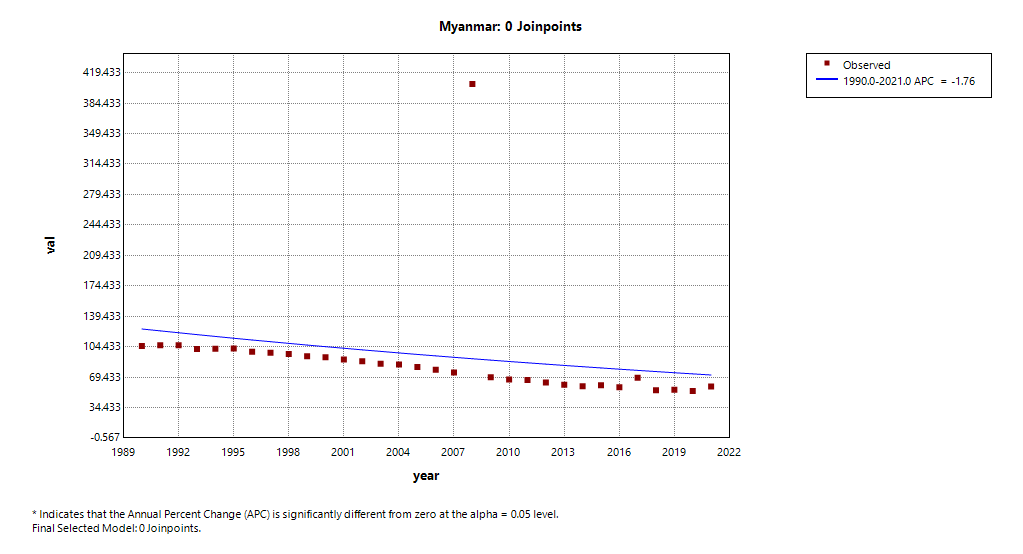 |
| (g) | (h) |
| 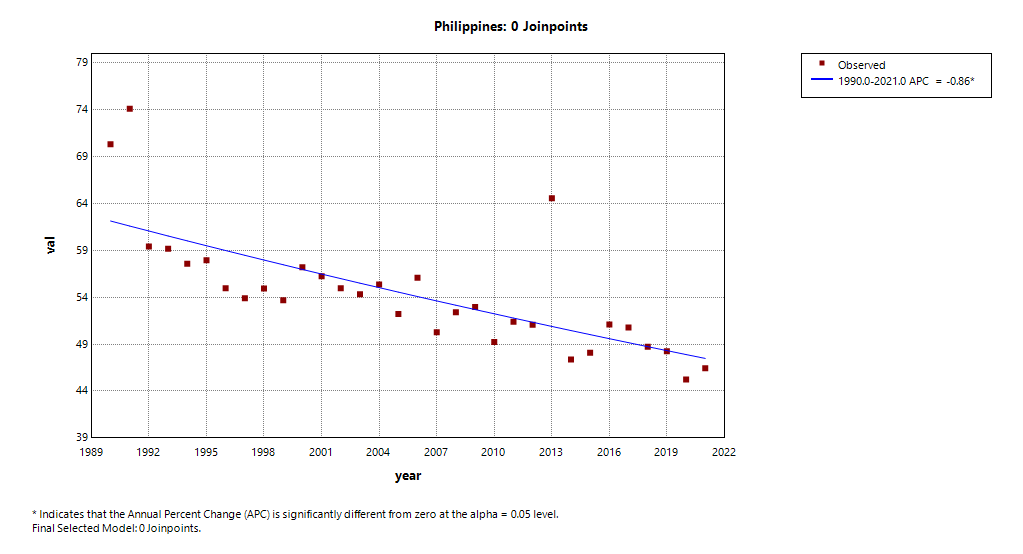 | 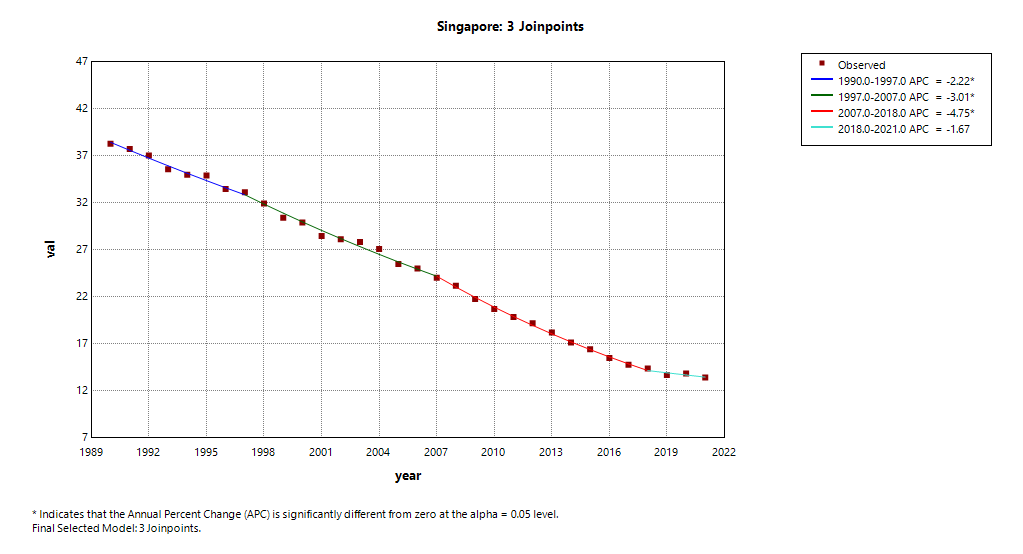 |
| (i) | (j) |
| 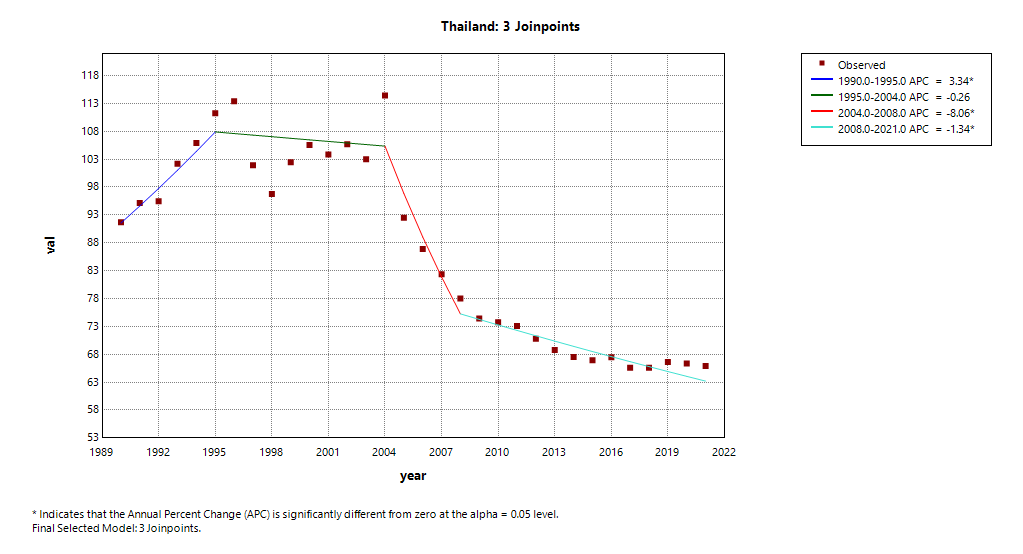 | 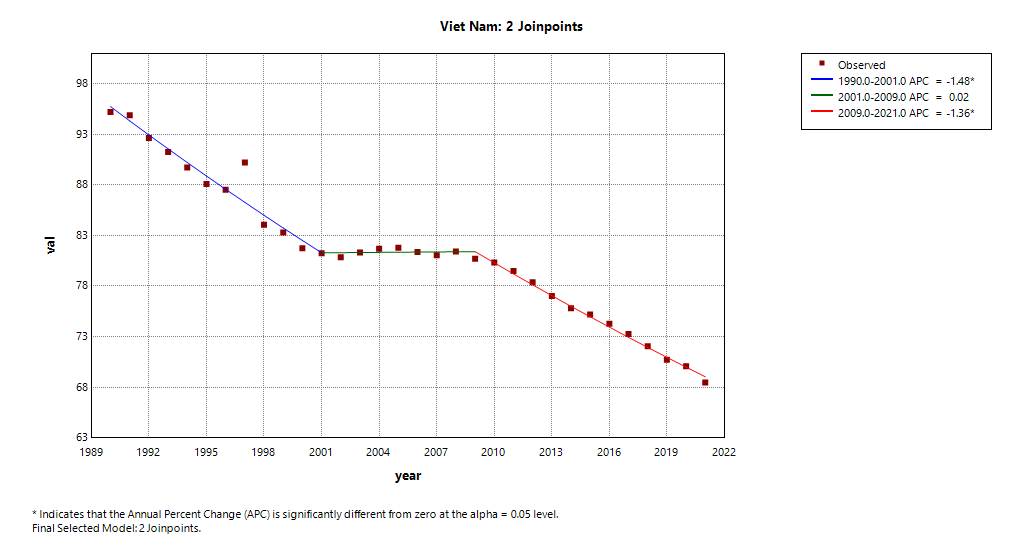 |
| (k) | (l) |

**Supplementary figure 4** The APC of ASDR of injury in China,ASEAN countries and global from 1990 to 2021 (* means p-values < 0.05 and significant results).(a) Global; (b) China;(c) Brunei; (d) Cambodia; (e) Indonesia; (f) Laos; (g) Malaysia; (h) Myanmar; (i) Philippines; (j) Singapore; (k) Thailand; (l) Vietnam.

| 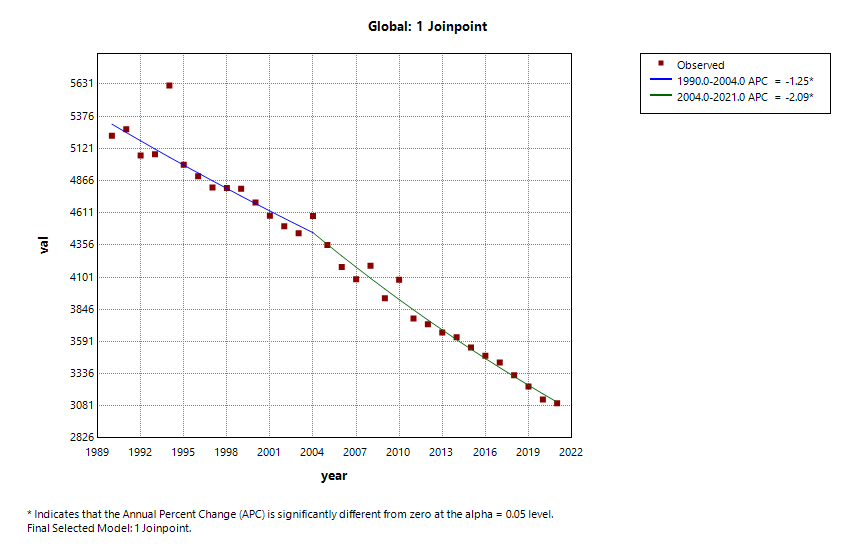 | 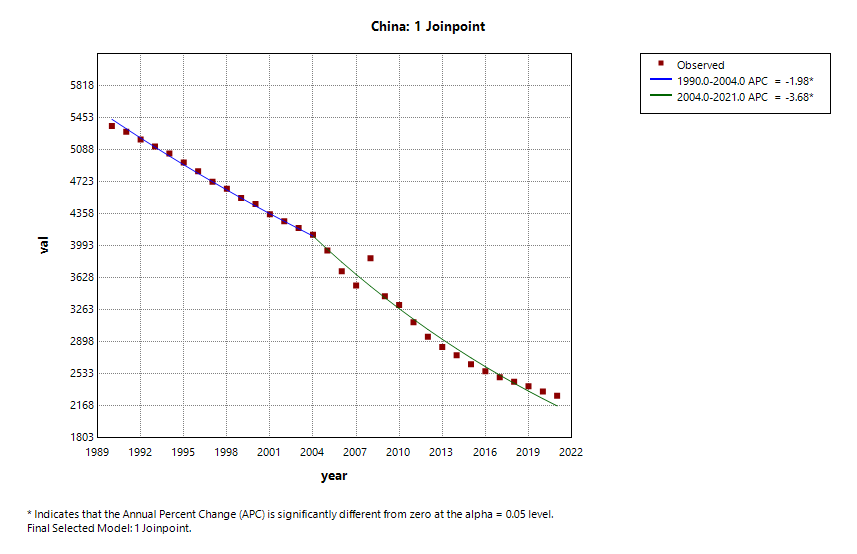 |
| --- | --- |
| (a) | (b) |
| 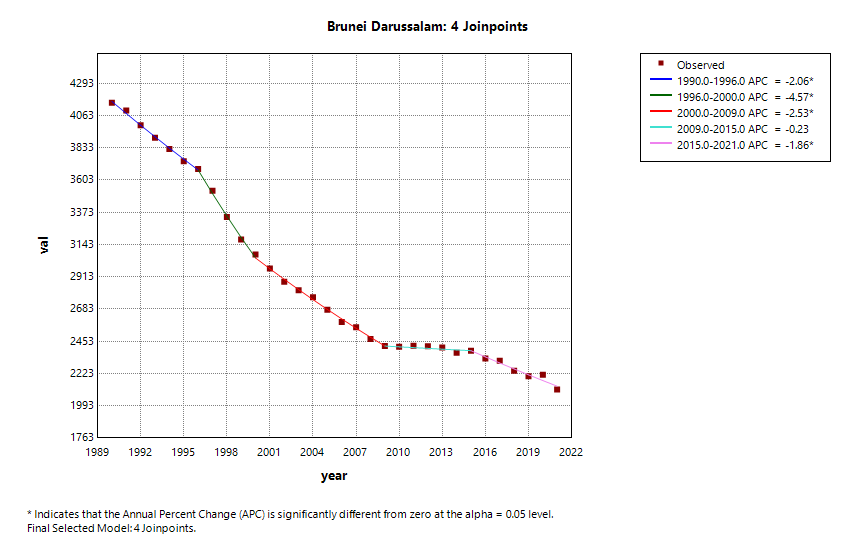 | 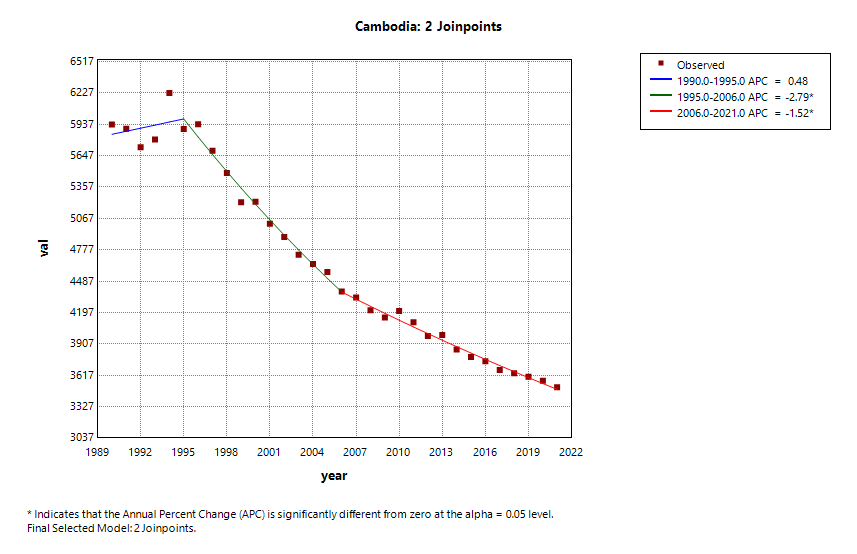 |
| (c) | (d) |
| 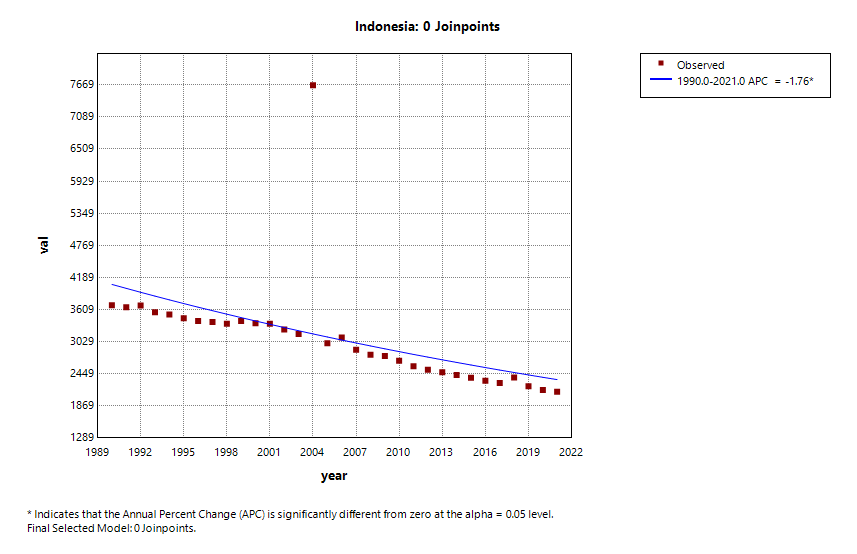 | 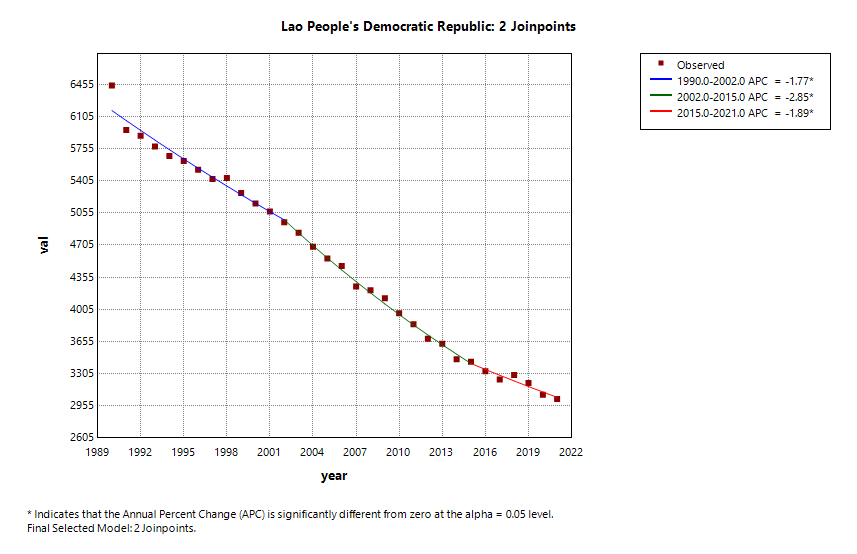 |
| (e) | (f) |
| 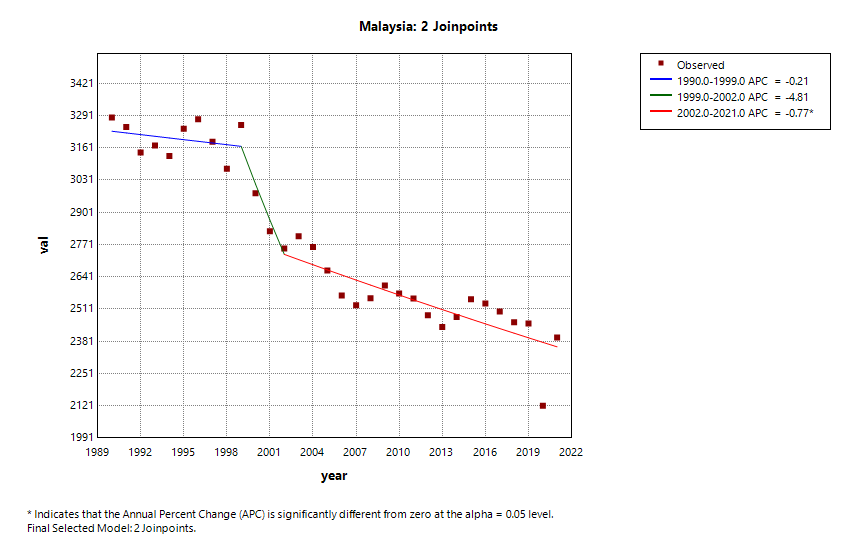 | 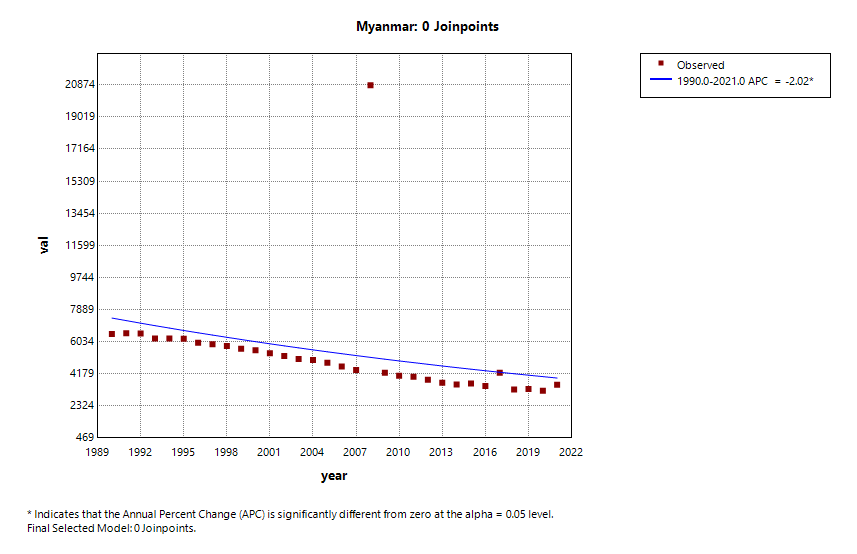 |
| (g) | (h) |
| 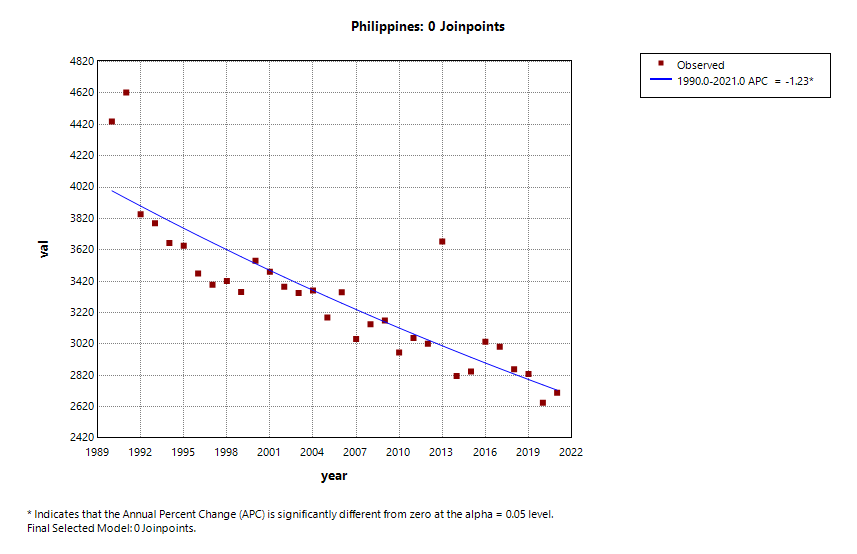 | 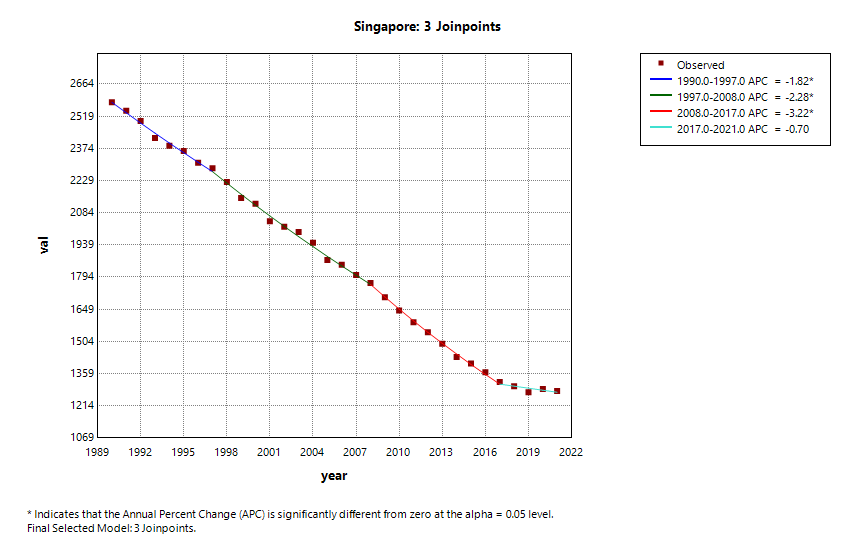 |
| (i) | (j) |
| 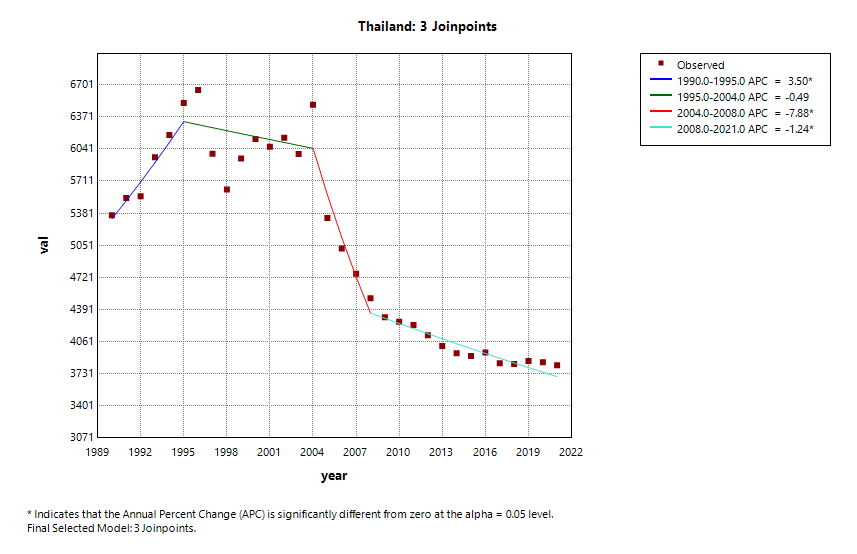 | 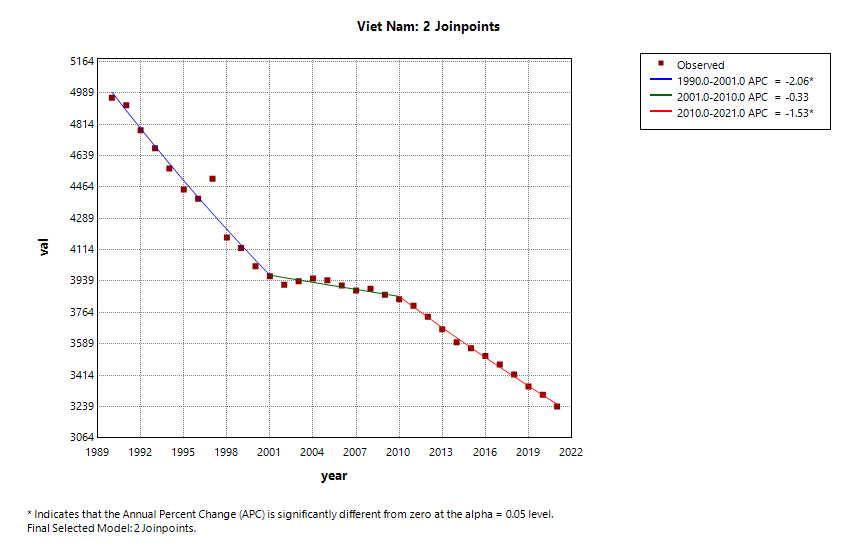 |
| (k) | (l) |
